# Supplementary material for: A polymer-like ultrahigh-strength metal alloy
Source: Research Square preprint supplement (doi:10.21203/rs.3.rs-3649839/v1), 2024-03-08
Supplement: Supplementary file 1 [file a7801cb30a9cb1bea6e9de11.docx]

Supplementary Information for

**A polymer-like ultrahigh-strength metal alloy**

Zhizhi Xu1, Yuanchao Ji1*, Tianyu Ma1, Chang Liu3, Liqiang He1, Ye Yuan4, Yu Qian1, Wenjia Wang1, Yang Yang1, Xiaobing Ren1,2*

*1 Frontier Institute of Science and Technology, and State Key Laboratory for Mechanical Behaviour of Materials,* *Xi’an Jiaotong University, Xi’an 710049, China*

*2 Center for Functional Materials, National Institute for Materials Science, Tsukuba 305-0047, Ibaraki, Japan*

*3 School of Materials Science and Engineering, Sichuan University, Chengdu 610065, China*

*4 Beijing National Laboratory for Condensed Matter Physics, Institute of Physics, Chinese Academy of Sciences, 100190 Beijing, China.*

*Correspondence to: jyc.xjtu@xjtu.edu.cn (YJ) and REN.Xiaobing@nims.go.jp (XR)

**This file includes:**

1. **Supplementary Movie 1**
2. **Supplementary Table 1**

**Supplementary Movie 1. A metal alloy showing simultaneously polymer-like ultrahigh flexibility and steel-like ultrahigh strength.**

All the samples here were in the same "dog bone" shape and size as those used for tensile testing (described in Method section). A light load of 0.02 kg (~0.03 GPa) was used to examine the flexibility and a heavy load of 1.02 kg (1.3 GPa, for spring steel and DS-STG alloy) or 0.52 kg (~0.65 GPa, for FRP) was used to examine the yield strength.

**Supplementary Table 1. Data source for mechanical properties of typical metal alloys and organic materials used in Fig. 1a.** Metal alloys include steel, Ti-alloy, Al-alloy, Cu-alloy, Mg-alloy and Ti-Ni-based shape memory alloys. Organic materials include bamboo, wood, bone, polyether ether ketone (PEEK), polyphenylene sulfide (PPS) and fiber reinforced polymers (FRP).

| Materials system | Yield stress  (GPa) | | Young’s modulus  (GPa) | | Elastic compliance  (1/GPa) | | Reference |
| --- | --- | --- | --- | --- | --- | --- | --- |
| Min | Max | Min | Max | Min | Max |  |
| **DS-STG alloy** | **1.1** | **1.8** | **9.2** | **12.1** | **0.0826** | **0.1087** | **Our work** |
| Steel | 0.2 | 1.2 | 190 | 220 | 0.0045 | 0.0053 | *Materials Selection in Mechanical Design* 4th edn (Elsevier, 2011) |
| 0.6 | 2.25 | 190 | 190 | 0.0053 | 0.0053 | *Science* **357**, 1029–1032 (2017) |
| 0.15 | 1.7 | 200 | 200 | 0.005 | 0.005 | *Prog. Mater. Sci.* **94**, 174–242 (2018) |
| Ti-alloy | 0.25 | 1.2 | 88 | 120 | 0.008 | 0.11 | *Materials Selection in Mechanical Design* 4th edn (Elsevier, 2011) |
| 0.2 | 1.18 | 40 | 110 | 0.009 | 0.03 | *Adv. Eng. Mater.* **21**, 1801215 (2019) |
| Al-alloy | 0.04 | 0.5 | 68 | 82 | 0.012 | 0.015 | *Materials Selection in Mechanical Design* 4th edn (Elsevier, 2011) |
| 0.17 | 0.47 | 63 | 75 | 0.013 | 0.016 | *Nature* **549**, 365–369 (2017) |
| 0.2 | 0.5 | 70 | 70 | 0.014 | 0.014 | *Science* **363**, 972–975 (2019) |
| 0.07 | 0.55 | 60 | 70 | 0.014 | 0.0167 | *Nature* **602**, 437–441 (2022) |
| Cu-alloy | 0.06 | 0.5 | 110 | 150 | 0.007 | 0.009 | *Materials Selection in Mechanical Design* 4th edn (Elsevier, 2011) |
| 0.06 | 0.4 | 110 | 110 | 0.009 | 0.009 | *Acta Mater*. **110**, 61–72 (2016) |
| Mg-alloy | 0.07 | 0.4 | 42 | 47 | 0.021 | 0.024 | *Materials Selection in Mechanical Design* 4th edn (Elsevier, 2011) |
| 0.05 | 0.4 | 15 | 47 | 0.021 | 0.067 | *Nat. Mater.* **21**, 1003–1007 (2022) |
| Ti-Ni SMA | 0.35 | 0. 5 | 28.6 | 75.5 | 0.013 | 0.034 | *Adv. Eng. Mater.* **24**, 2200239 (2022) |
| 1.42 | 1.42 | 33 | 33 | 0.030 | 0.030 | *J. Mater. Sci. Technol.* **57**, 197–203 (2020) |
| 0.28 | 0.68 | 28 | 68 | 0.015 | 0.036 | *Scr. Mater.* **209**, 114374 (2022) |
| 0.5 | 2 | 35 | 57 | 0.018 | 0.029 | *Acta Mater.* **231**, 117890 (2022) |
| 0.42 | 0.42 | 70 | 70 | 0.014 | 0.014 | *Science* **353**, 559–562 (2016) |
| NICSMA | 1.65 | 1.65 | 28 | 28 | 0.036 | 0.036 | *Science* **339**, 1191–1194 (2013) |
| Bamboo | 0.15 | 0.35 | 11 | 30 | 0.033 | 0.091 | *Mater. Des.* **63**, 820–828 (2014) |
| Wood | 0.03 | 0.07 | 6 | 20 | 0.050 | 0.167 | *Materials Selection in Mechanical Design* 4th edn (Elsevier, 2011) |
| 0.04 | 0.12 | 5 | 12 | 0.083 | 0.200 | *Wood handbook: Wood as an Engineering Material* (USDA, 2021) |
| Bone | 0.06 | 0.15 | 15 | 24 | 0.042 | 0.067 | *Adv. Eng. Mater.***21**, 1801215 (2019) |
| PEEK | 0.09 | 0.11 | 3.5 | 3.9 | 0.256 | 0.286 | *Polymer Properties & Chemical Resistance of Plastics.* (specialchem.com) |
| PPS | 0.05 | 0.08 | 3.3 | 4 | 0.250 | 0.303 | *Polymer Properties & Chemical Resistance of Plastics* (specialchem.com) |
| FRP | 0.06 | 0.23 | 3 | 37 | 0.027 | 0.333 | *Polymer Properties & Chemical Resistance of Plastics* (specialchem.com) |
